# Supplementary material for: Dramatic influence of the hydroxy functionality of azasugar moiety in the head group region of tocopherol-based cationic lipids on in vitro gene transfection efficacies
Source: Royal Society of Chemistry journal article supplement (doi:10.1039/d0nj03717f), 2020-12-15
Supplement: d0nj03717f1.pdf [file d0nj03717f1.pdf]

**Dramatic Influence of Hydroxy Functionality of Azasugar Moiety in the Head Group  
Region of Tocopherol Based Cationic Lipids on the *In-vitro* Gene Transfection Efficacies**

Venkanna Muripiti <sup>1</sup>, Brijesh Lohchania <sup>2</sup>, Venkatesh Ravula<sup>1</sup>, Shireesha Manturthi<sup>1</sup>, Srujan Marepally<sup>2</sup>, Amarnath Velidandi<sup>1</sup>, Srilakshmi.V. Patri<sup>1\*</sup>

<sup>1</sup>National Institute of Technology, Warangal-506004, Telangana, India, <sup>2</sup>Centre for Stem <sup>2</sup>Cell Research, Vellore, Tamil Nadu, India

Email: [patrisrilakshmi@gmail.com](mailto:patrisrilakshmi@gmail.com).

Spectra

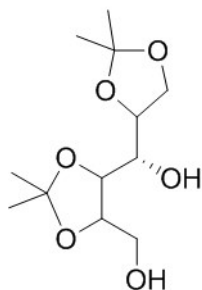

### <sup>1</sup>H NMR Spectra of Intermediate 1A, Scheme 1

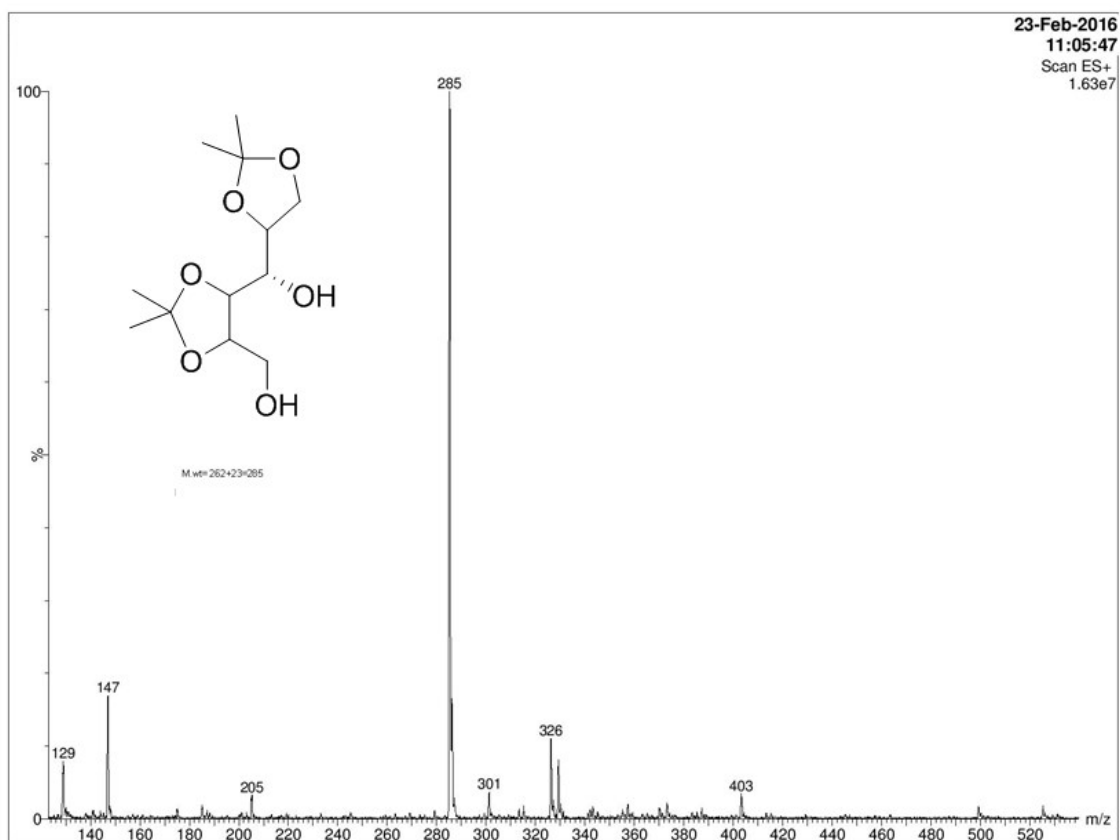

**ESI-Mass Spectra of Intermediate 1A, Scheme 1**

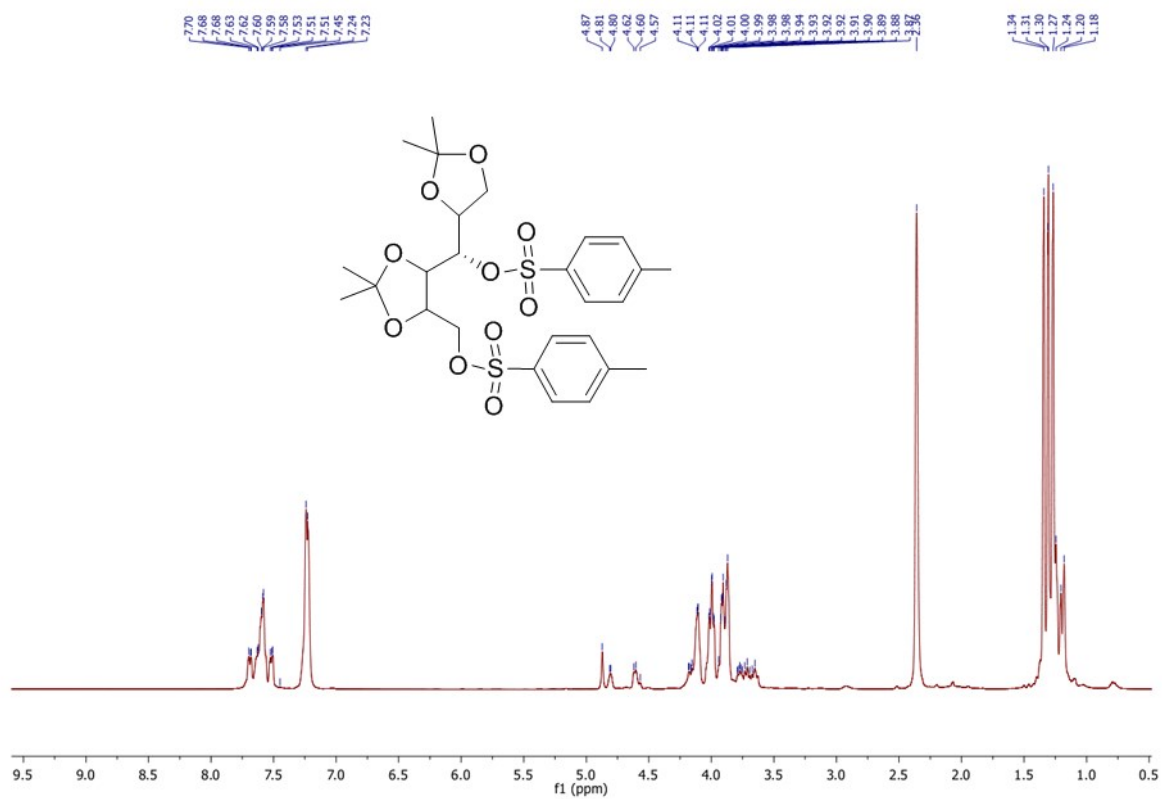

**<sup>1</sup>H NMR Spectra of Intermediate 1B, Scheme 1**

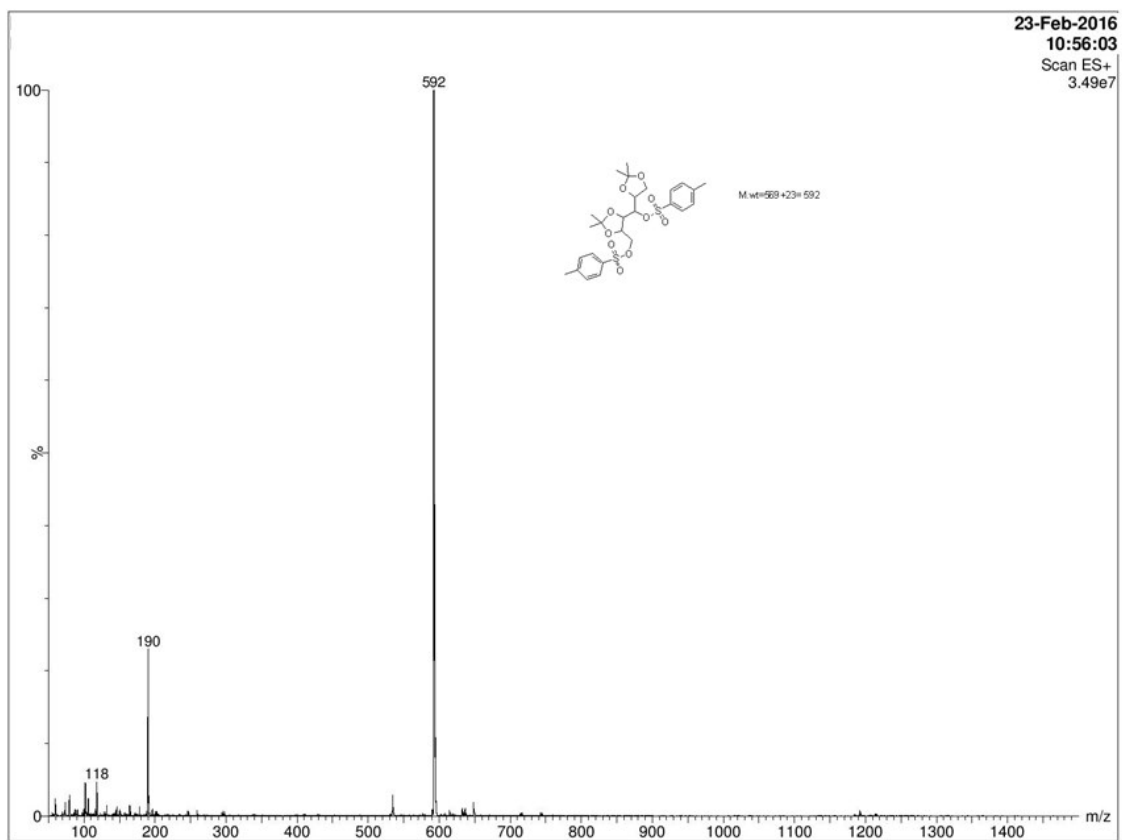

### ESI-Mass Spectra of Intermediate 1B, Scheme 1

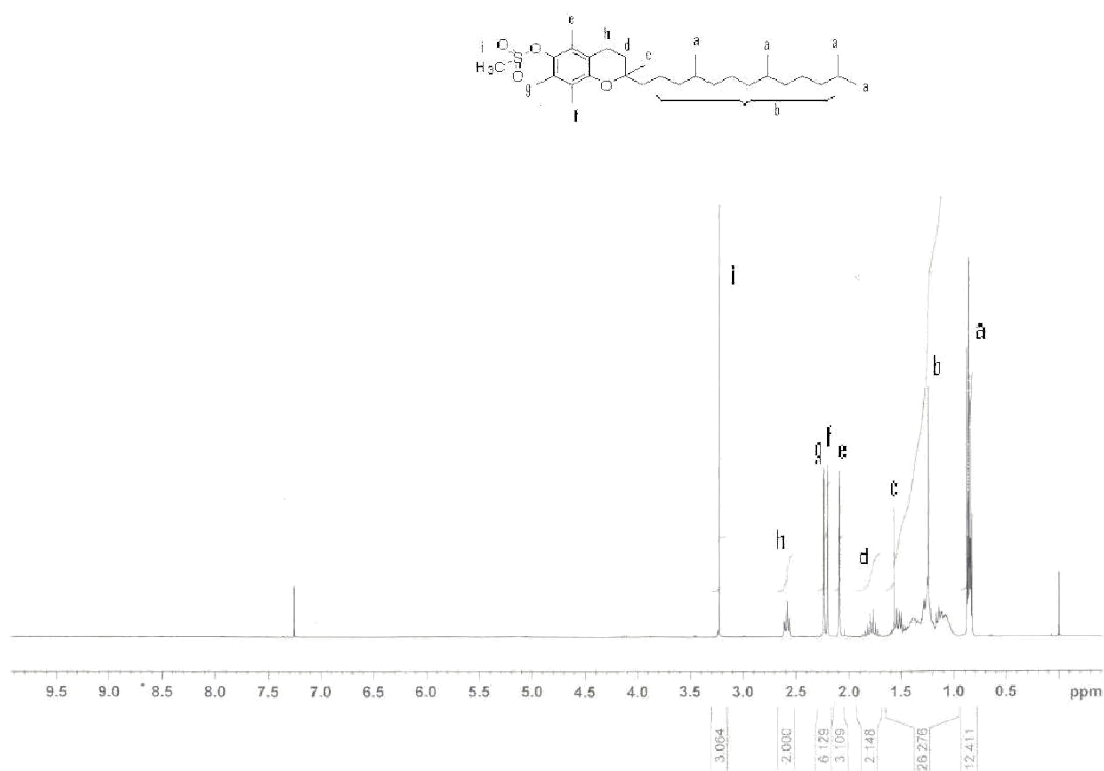

**<sup>1</sup>H NMR Spectra of Intermediate 1C, Scheme 1**





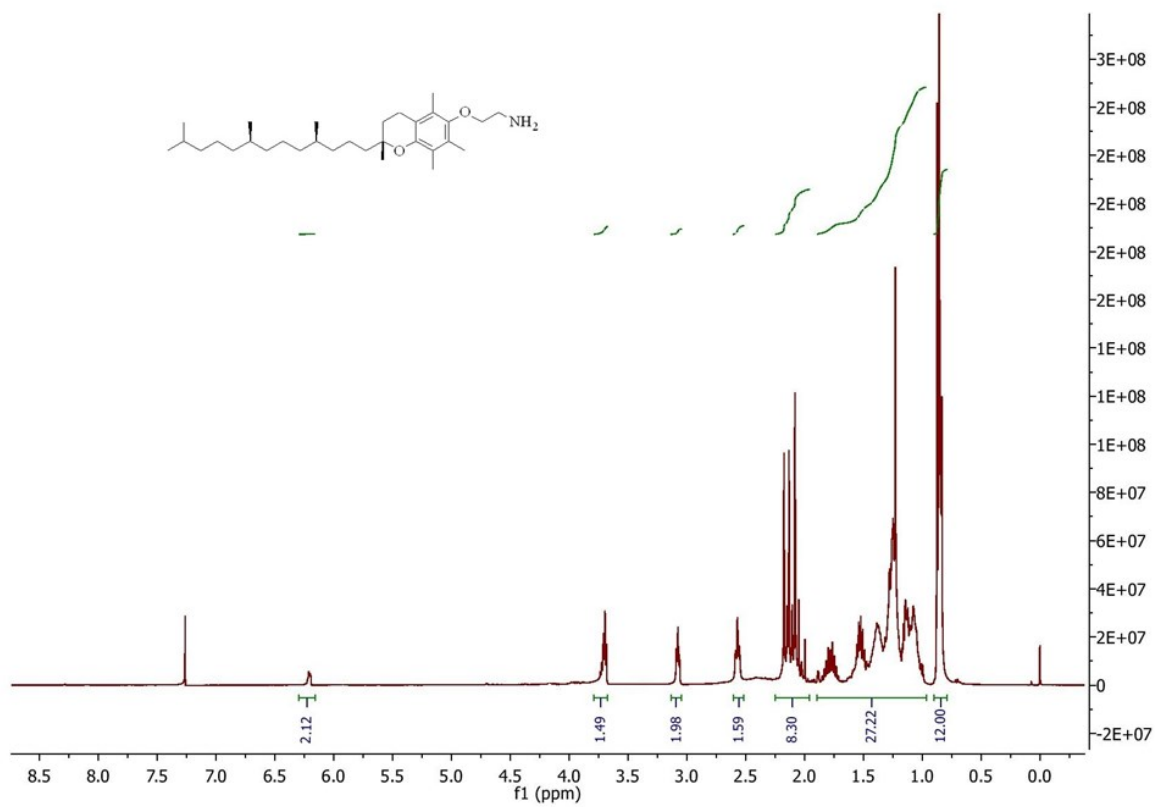

**$^1\text{H}$  NMR Spectra of Intermediate 1D, Scheme 1**

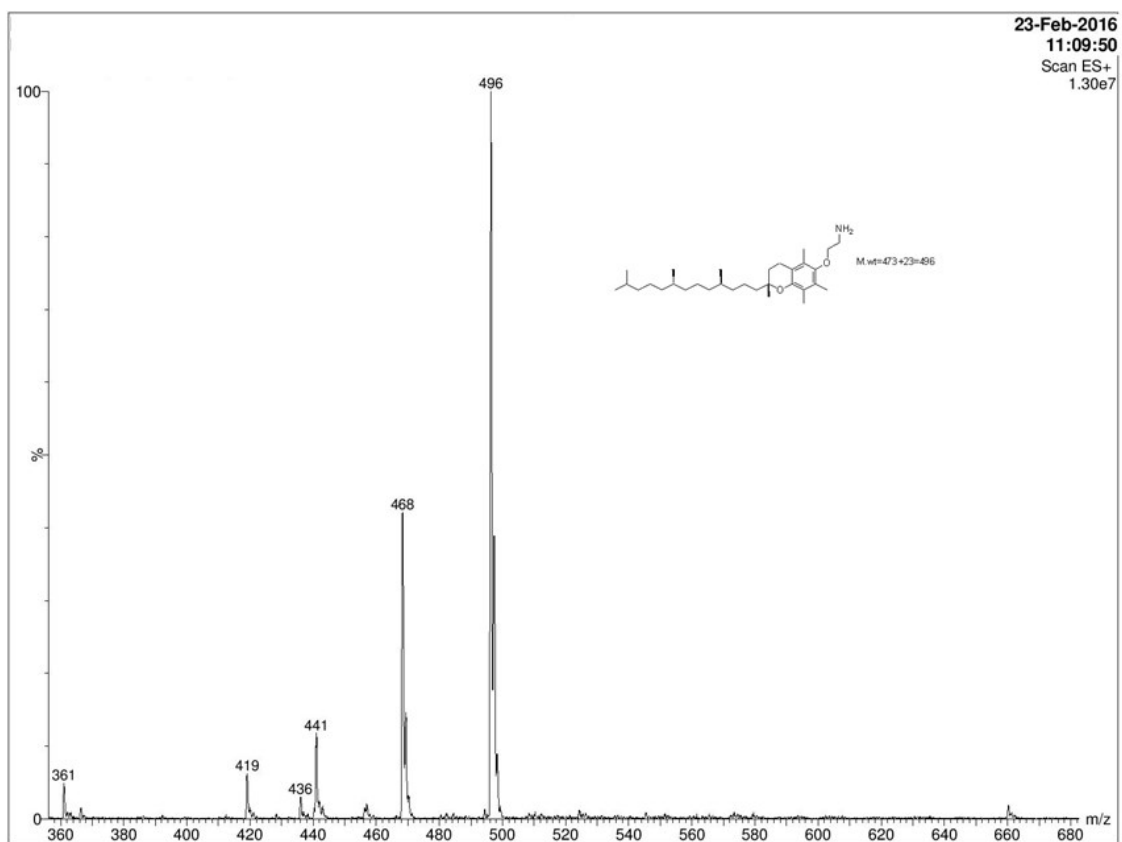

**ESI-Mass Spectra of Intermediate 1D, Scheme 1**

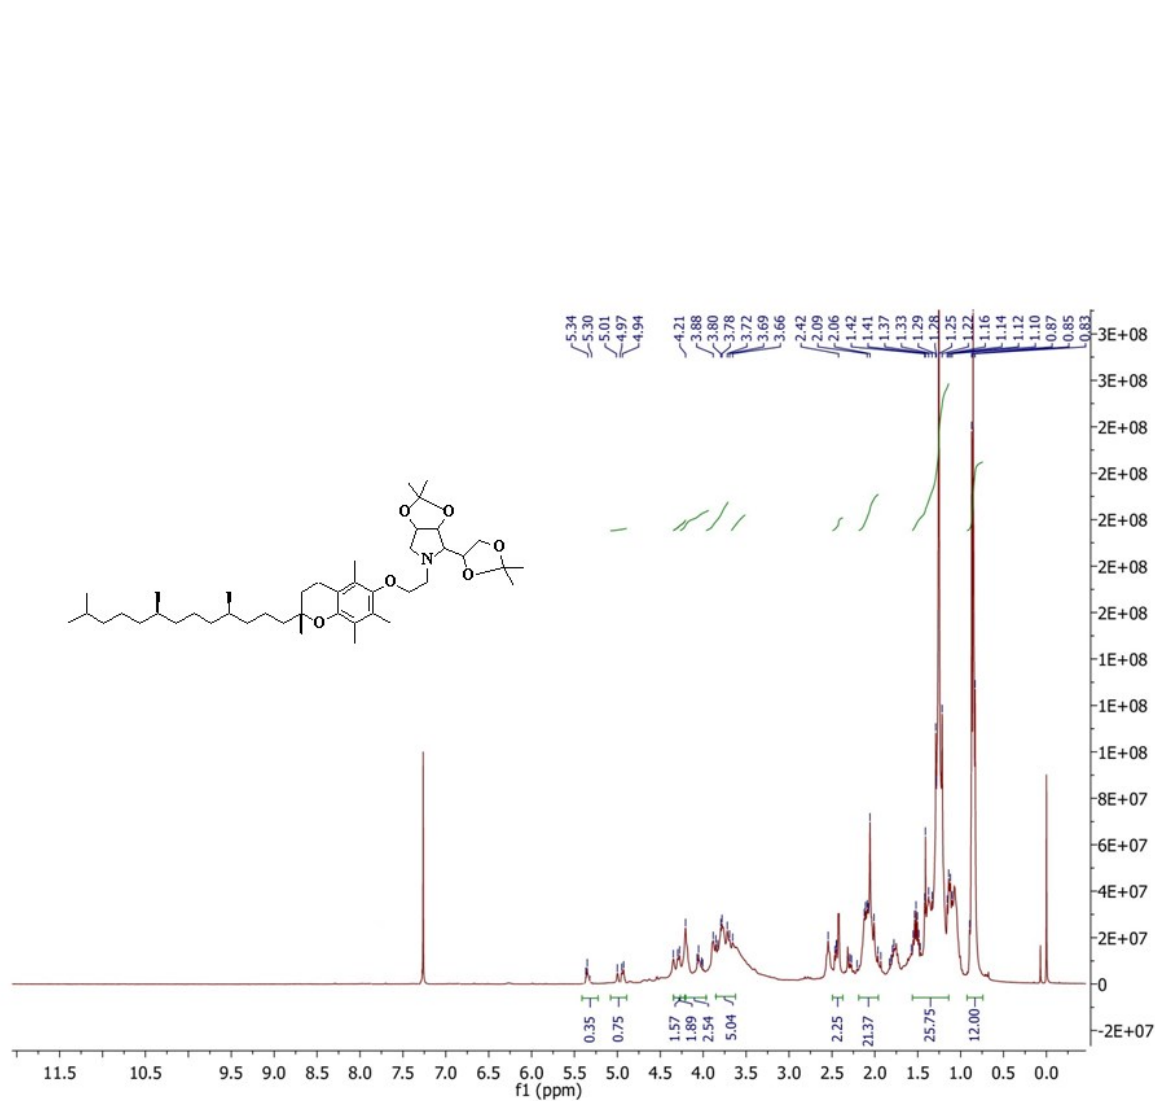

$^1\text{H}$  NMR Spectra of Lipid (1F) Toc-Aza

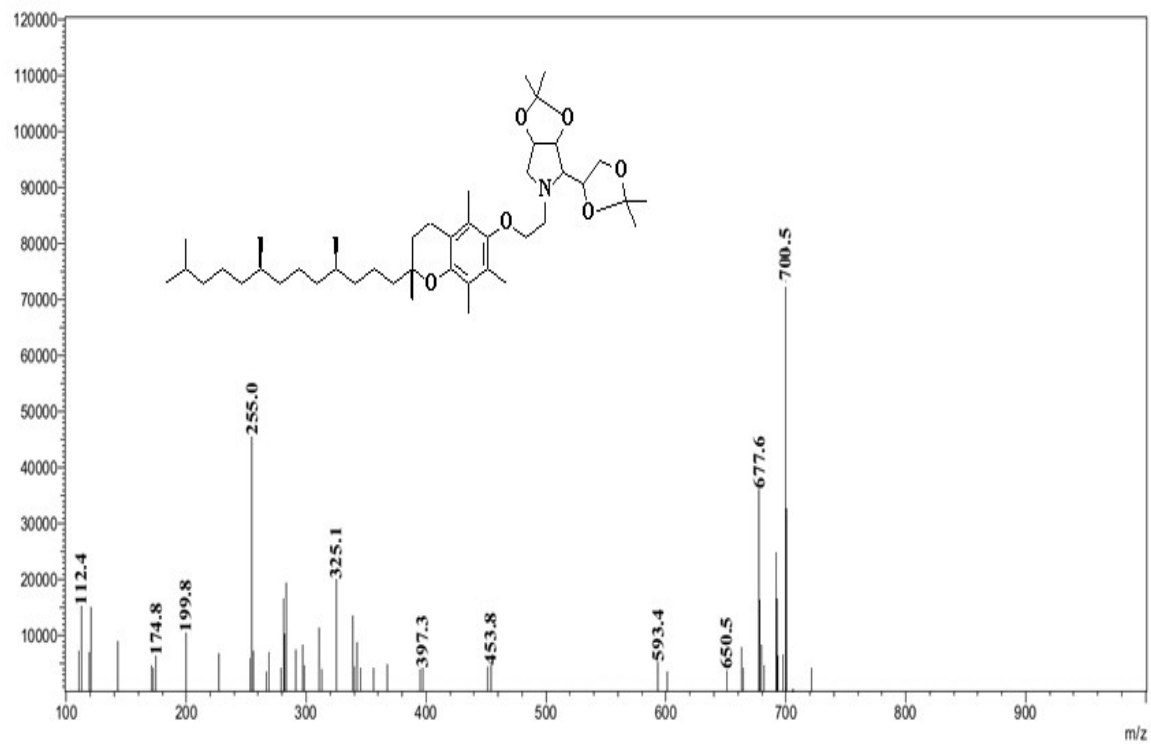

**ESI-Mass Spectra of Intermediate 1E, Scheme 1**

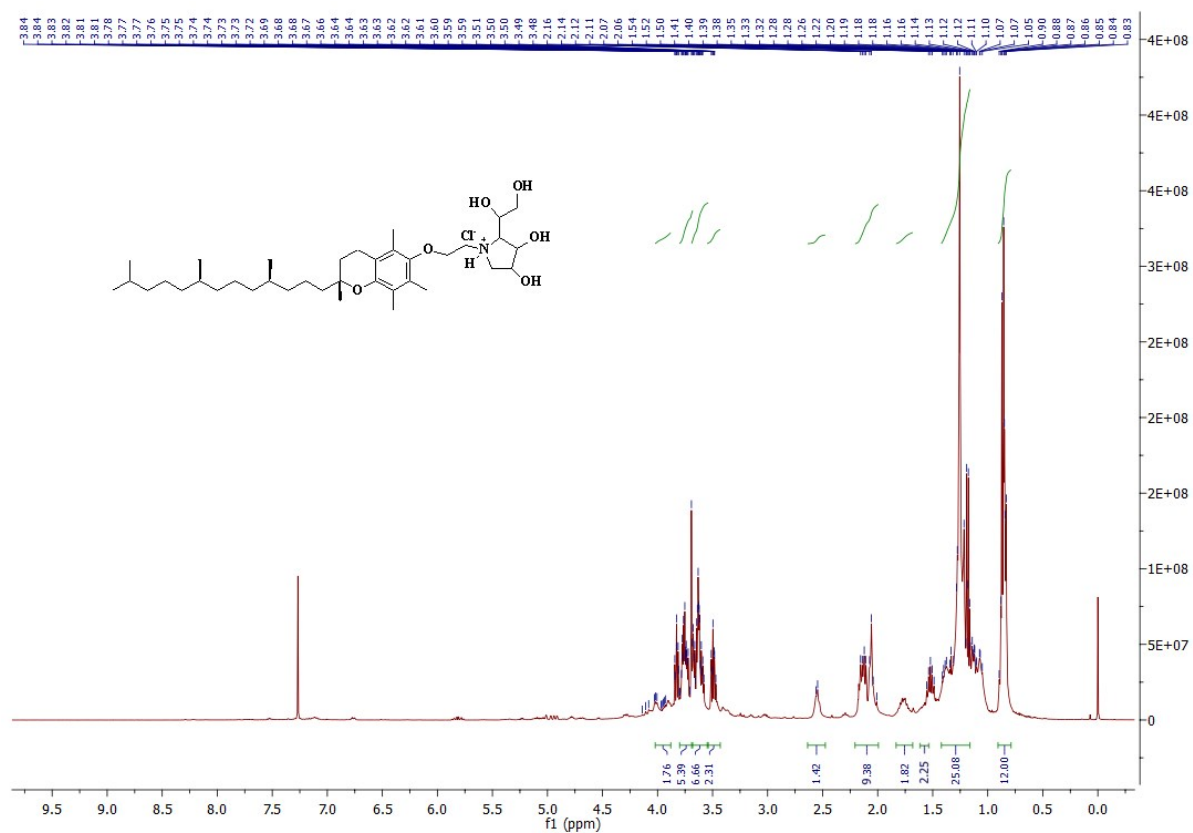

**$^1\text{H}$  NMR Spectra of Lipid (1F) Toc-Aza**





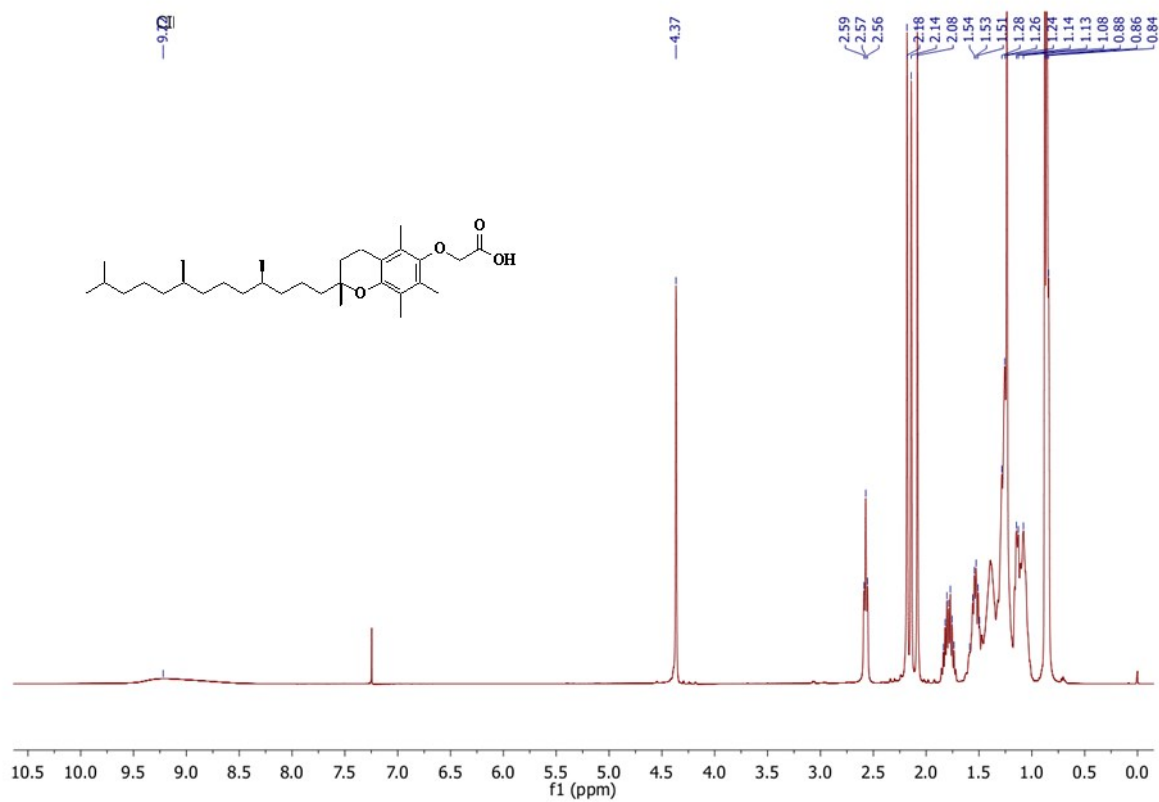

**$^1\text{H}$  NMR Spectra of Intermediate 2A, Scheme 2**



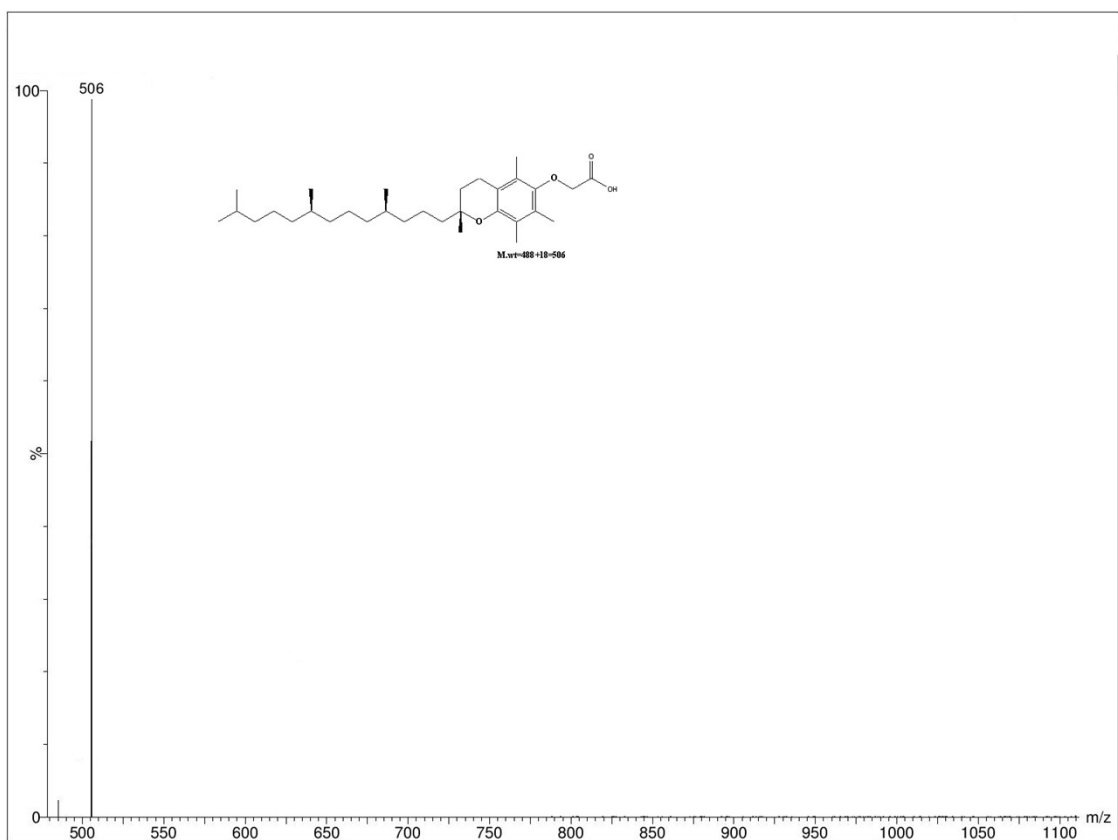

**ESI-Mass Spectra of Intermediate 2A, Scheme 2**

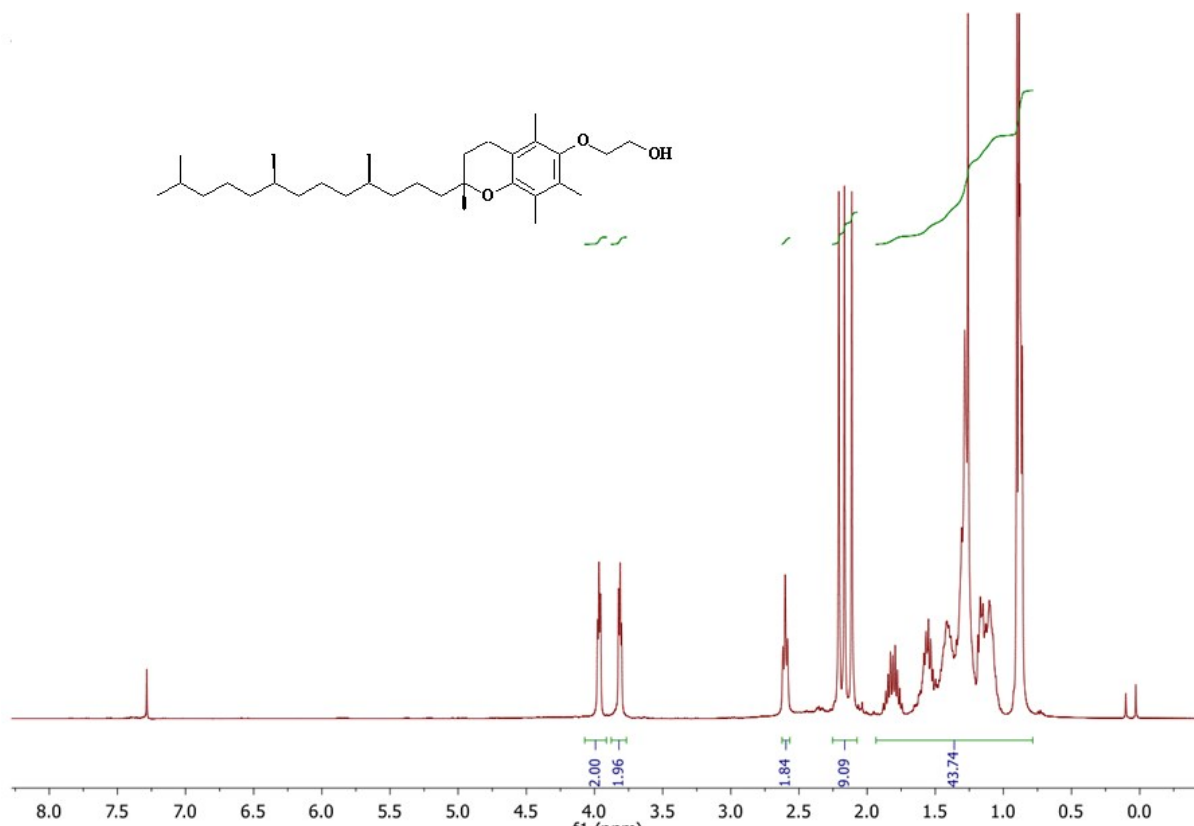

**<sup>1</sup>H NMR Spectra of Intermediate 2B, Scheme 2**

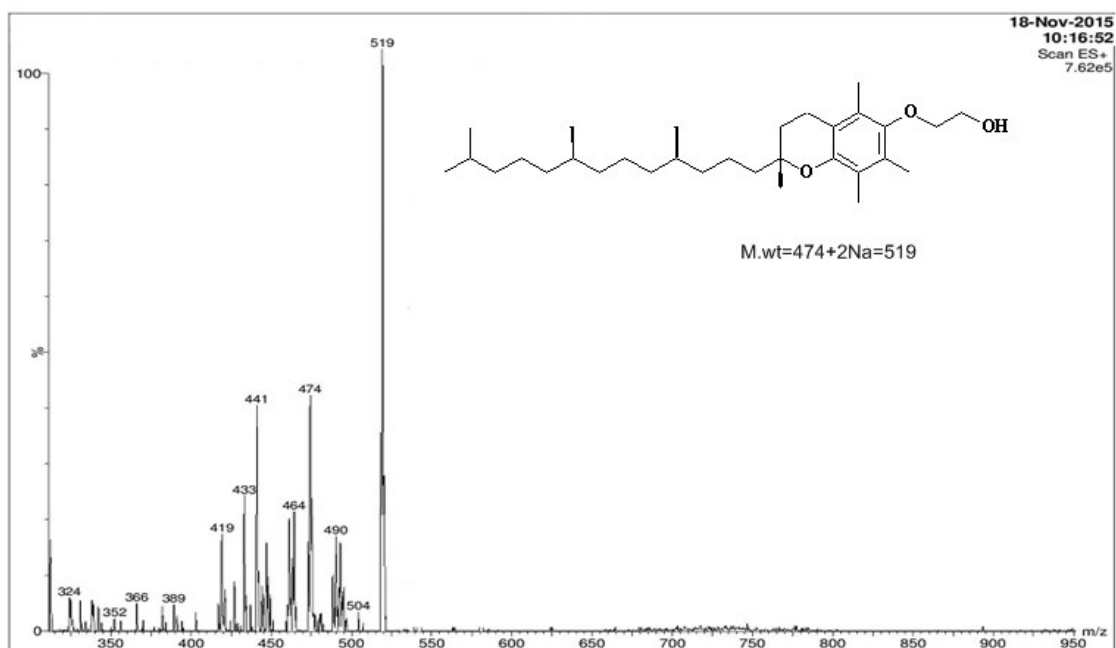

**ESI-Mass Spectra of Intermediate 2B, Scheme 2**

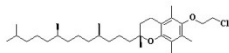

### <sup>1</sup>H NMR Spectra of Intermediate 2C, Scheme 2

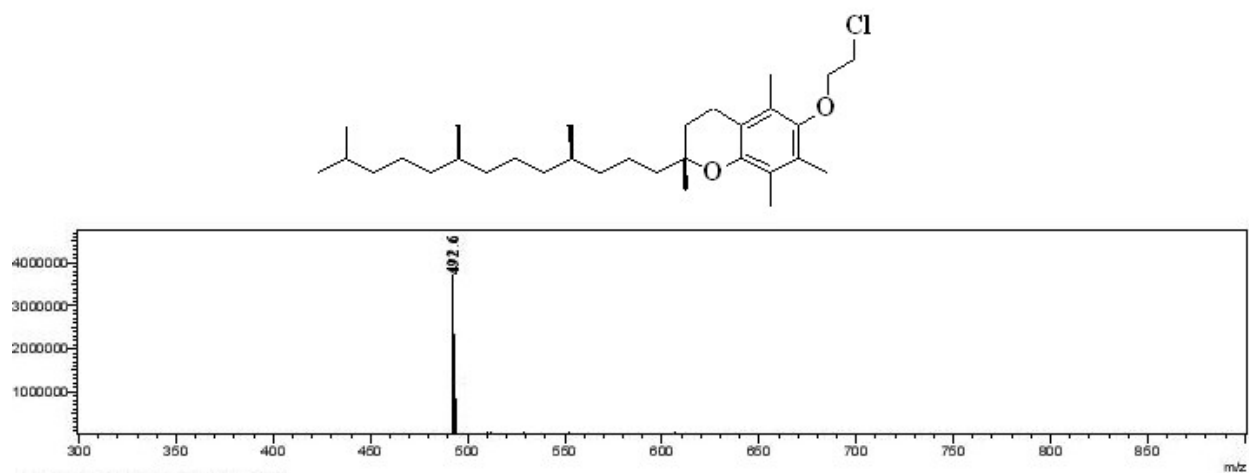

**ESI-Mass Spectra of Intermediate 2C, Scheme 2**





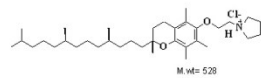

### ESI-HRMS-Mass Spectra of Toc-pyrr Lipid



### HPLC purity of Lipids Toc-Aza and Toc-Pyrr

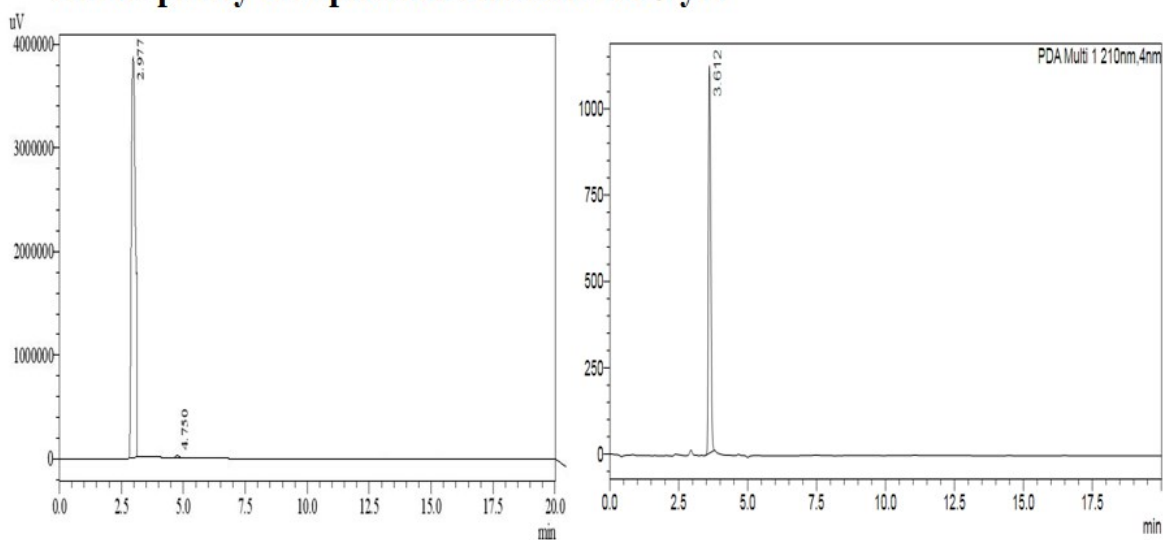

Figure X. RP-HPLC Chromatograms for Lipids **Toc-Aza** and **Toc-Pyrr** obtained using 100% methanol's as mobile phase.

#### HPLC Conditions:

|                                 |                                            |
|---------------------------------|--------------------------------------------|
| <b>System:</b>                  | Shimadzu Lab Solutions                     |
| <b>Column:</b>                  | Microsorb® 100, RP-18e (10 µm), 125 x 4 mm |
| <b>Mobile Phase:</b>            | 100% Methanol.                             |
| <b>Flow Rate:</b>               | 1.0 mL/min                                 |
| <b>Typical Column Pressure:</b> | 50-55 Bars                                 |
| <b>Detection:</b>               | UV at 263 nm                               |
